# Supplementary material
Source: Springer Nature journal article supplement (https://www.springermedizin.de/resource/supplementary/12984_2012_418_MOESM8_ESM.pdf/9604532)

## FTP

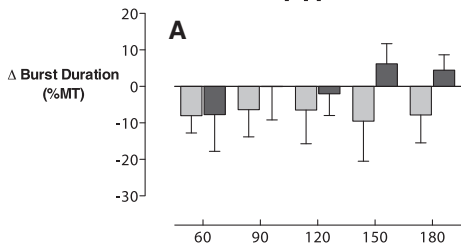

## Hybrid

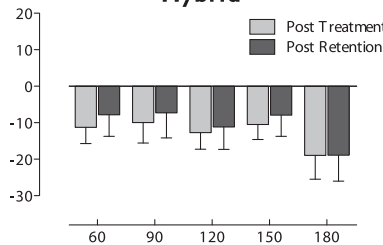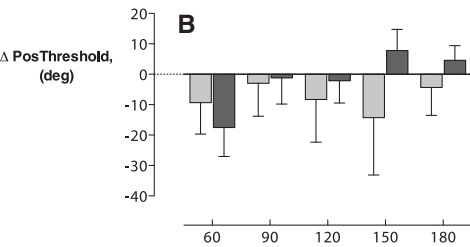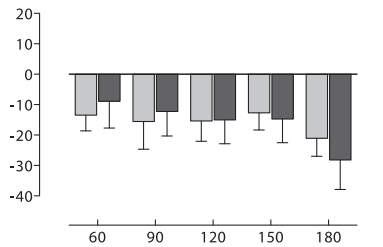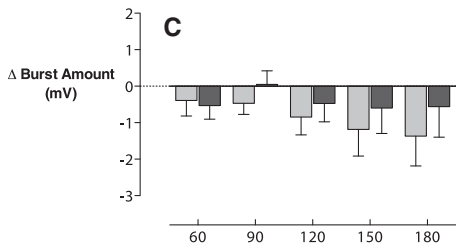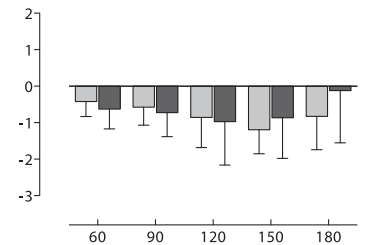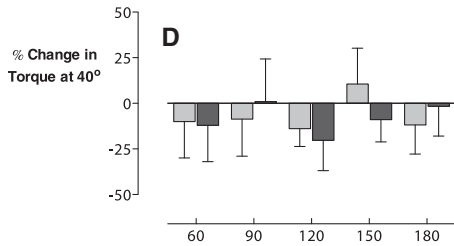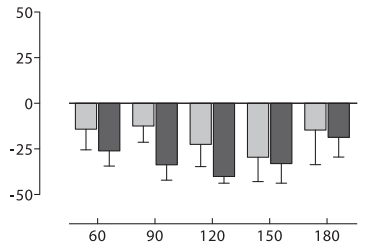

Velocity (deg/s)

Velocity (deg/s)

Supplement: MOESM8 [file 9604532]
